# Supplementary material for: Virulence of invasive Salmonella Typhimurium ST313 in animal models of infection
Source: PubMed Central journal article supplement (PMC5559095; doi:10.1371/journal.pntd.0005697), 2017-08-04
Supplement: pntd.0005697.s004.pdf [file pntd.0005697.s004.pdf]

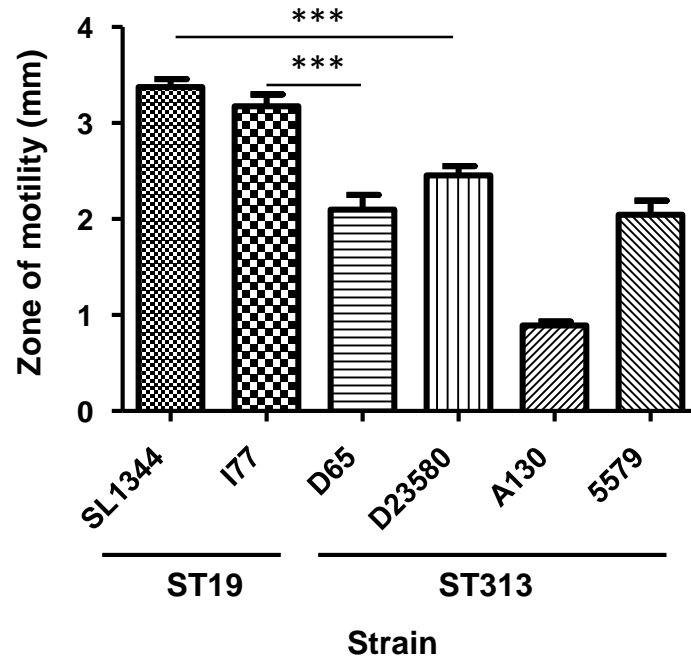

S2 Fig
